# Supplementary material for: Disparities in Health Financing Allocation among Infectious Diseases in Ebola Virus Disease (EVD)-Affected Countries, 2005–2017
Source: MDPI journal article supplement (doi:10.3390/healthcare10020179), 2022-01-18
Supplement: s1 [file s1]

**Supplementary Table S1: DAH (thousand dollars) for EVD affected countries**

**A. Guinea**

| Category     | 2005   | 2006   | 2007   | 2008   | 2009   | 2010   | 2011   | 2012   | 2013   | 2014    | 2015    | 2016    | 2017    |
|--------------|--------|--------|--------|--------|--------|--------|--------|--------|--------|---------|---------|---------|---------|
| Total        | 44,759 | 48,986 | 36,529 | 47,091 | 43,593 | 59,147 | 46,691 | 70,940 | 57,931 | 258,105 | 264,868 | 251,320 | 155,340 |
| VPDs         | 3,635  | 4,350  | 875    | 5,612  | 7,852  | 8,823  | 2,871  | 4,266  | 3,587  | 5,969   | 12,265  | 2,928   | 1,123   |
| HIV/AIDS     | 12,350 | 13,525 | 9,304  | 9,527  | 9,958  | 9,623  | 12,959 | 6,966  | 15,461 | 13,358  | 14,760  | 29,645  | 16,613  |
| Malaria      | 5,684  | 723    | 5,093  | 2,546  | 892    | 15,873 | 316    | 28,143 | 10,750 | 47,304  | 19,185  | 57,933  | 26,880  |
| Tuberculosis | 20     | 1,235  | 1,437  | 1,895  | 1,006  | 2,408  | 434    | 368    | 2,045  | 3,456   | 2,556   | 3,633   | 3,867   |
| EVD          | —      | —      | —      | 1      | —      | —      | —      | —      | —      | 90,253  | 162,159 | 55,434  | 11,834  |

**B. Liberia**

| Category     | 2005   | 2006   | 2007   | 2008   | 2009    | 2010    | 2011    | 2012    | 2013    | 2014    | 2015    | 2016    | 2017    |
|--------------|--------|--------|--------|--------|---------|---------|---------|---------|---------|---------|---------|---------|---------|
| Total        | 25,044 | 33,831 | 31,434 | 82,417 | 113,604 | 120,386 | 131,451 | 153,947 | 139,521 | 382,699 | 654,128 | 241,823 | 162,785 |
| VPDs         | 1,779  | 4,201  | 2,737  | 4,028  | 9,892   | 3,692   | 5,233   | 8,457   | 5,727   | 1,739   | 9,998   | 3,307   | 4,370   |
| HIV/AIDS     | 6,181  | 5,131  | 9,444  | 11,931 | 15,592  | 19,330  | 21,835  | 19,461  | 22,801  | 8,948   | 10,597  | 17,665  | 17,938  |
| Malaria      | 6,266  | 8,310  | 1,479  | 18,177 | 20,780  | 29,151  | 28,446  | 34,507  | 22,381  | 30,456  | 19,004  | 24,172  | 26,718  |
| Tuberculosis | 2,766  | 1,939  | 131    | 2,485  | 4,145   | 3,646   | 2,703   | 6,075   | 3,550   | 367     | 1,096   | 1,317   | 1,037   |
| EVD          | —      | —      | —      | 2      | —       | —       | —       | —       | —       | 211,578 | 503,454 | 79,933  | 14,285  |

C. Sierra Leone

| Category     | 2005   | 2006   | 2007   | 2008   | 2009   | 2010    | 2011   | 2012    | 2013    | 2014    | 2015    | 2016    | 2017    |
|--------------|--------|--------|--------|--------|--------|---------|--------|---------|---------|---------|---------|---------|---------|
| Total        | 51,071 | 49,873 | 53,805 | 81,787 | 91,762 | 111,867 | 98,180 | 100,813 | 119,760 | 582,377 | 665,539 | 344,283 | 207,644 |
| VPDs         | 1,364  | 3,547  | 6,496  | 3,947  | 11,974 | 10,547  | 2,789  | 9,670   | 6,591   | 10,415  | 12,963  | 4,182   | 6,977   |
| HIV/AIDS     | 9,059  | 6,965  | 8,412  | 14,556 | 16,313 | 25,561  | 19,482 | 21,590  | 14,237  | 22,474  | 7,809   | 20,697  | 29,702  |
| Malaria      | 7,963  | 8,232  | 5,649  | 10,722 | 6,851  | 9,314   | 18,001 | 4,347   | 12,142  | 18,010  | 7,225   | 14,865  | 16,057  |
| Tuberculosis | 951    | 1,158  | 1,893  | 2,808  | 748    | 2,468   | 1,183  | 773     | 3,765   | 1,125   | 1,688   | 3,793   | 9,853   |
| EVD          | —      | —      | —      | 2      | —      | —       | —      | —       | —       | 360,573 | 454,416 | 111,246 | 25,197  |

D. Democratic Republic of Congo

| Category     | 2005    | 2006    | 2007    | 2008    | 2009    | 2010    | 2011    | 2012    | 2013    | 2014    | 2015    | 2016    | 2017    |
|--------------|---------|---------|---------|---------|---------|---------|---------|---------|---------|---------|---------|---------|---------|
| Total        | 175,972 | 185,263 | 188,969 | 442,473 | 472,461 | 495,120 | 568,240 | 692,440 | 681,314 | 676,375 | 721,021 | 714,014 | 820,680 |
| VPDs         | 12,640  | 25,057  | 21,133  | 51,813  | 40,289  | 63,518  | 80,329  | 27,611  | 74,507  | 108,284 | 102,637 | 73,250  | 68,751  |
| HIV/AIDS     | 42,219  | 42,461  | 43,258  | 77,936  | 87,802  | 98,863  | 98,106  | 163,371 | 129,902 | 81,934  | 86,946  | 125,567 | 151,200 |
| Malaria      | 28,592  | 15,639  | 14,346  | 60,006  | 116,288 | 88,964  | 79,562  | 199,013 | 130,580 | 193,661 | 170,539 | 195,287 | 192,403 |
| Tuberculosis | 4,195   | 10,173  | 14,882  | 18,045  | 14,032  | 16,137  | 16,384  | 36,477  | 21,722  | 22,459  | 43,799  | 37,995  | 32,295  |
| EVD          | —       | —       | 464     | 105     | —       | —       | 16      | —       | —       | 87      | 713     | —       | 62      |

**Supplementary Table S2: DALYs (thousands) in EVD affected countries****A. Guinea**

| Category     | 2005  | 2006  | 2007  | 2008  | 2009  | 2010  | 2011  | 2012  | 2013  | 2014  | 2015  | 2016  | 2017  |
|--------------|-------|-------|-------|-------|-------|-------|-------|-------|-------|-------|-------|-------|-------|
| Total        | 7,696 | 7,673 | 7,636 | 7,541 | 7,504 | 7,422 | 7,340 | 7,275 | 7,202 | 7,310 | 7,129 | 6,944 | 6,868 |
| VPDs         | 1,122 | 1,105 | 1,064 | 970   | 1,015 | 934   | 907   | 931   | 883   | 885   | 877   | 827   | 743   |
| HIV/AIDS     | 289   | 304   | 313   | 319   | 318   | 304   | 290   | 276   | 238   | 220   | 210   | 191   | 182   |
| Malaria      | 1,140 | 1,136 | 1,147 | 1,156 | 1,116 | 1,118 | 1,091 | 1,033 | 991   | 921   | 858   | 823   | 823   |
| Tuberculosis | 230   | 233   | 234   | 234   | 233   | 236   | 234   | 232   | 234   | 236   | 234   | 231   | 226   |
| EVD          | 0     | 0     | 0     | 0     | 0     | 0     | 0     | 0     | 0     | 188   | 91    | 1     | 0     |

**B. Liberia**

| Category     | 2005  | 2006  | 2007  | 2008  | 2009  | 2010  | 2011  | 2012  | 2013  | 2014  | 2015  | 2016  | 2017  |
|--------------|-------|-------|-------|-------|-------|-------|-------|-------|-------|-------|-------|-------|-------|
| Total        | 2,377 | 2,331 | 2,315 | 2,304 | 2,299 | 2,320 | 2,363 | 2,321 | 2,275 | 2,614 | 2,364 | 2,196 | 2,162 |
| VPDs         | 258   | 231   | 214   | 193   | 196   | 210   | 209   | 219   | 225   | 223   | 222   | 205   | 189   |
| HIV/AIDS     | 179   | 181   | 179   | 172   | 163   | 153   | 142   | 129   | 119   | 111   | 106   | 102   | 100   |
| Malaria      | 387   | 381   | 377   | 378   | 359   | 333   | 316   | 244   | 203   | 204   | 191   | 192   | 186   |
| Tuberculosis | 59    | 58    | 57    | 57    | 58    | 59    | 60    | 62    | 62    | 60    | 59    | 59    | 58    |
| EVD          | 0     | 0     | 0     | 0     | 0     | 0     | 0     | 0     | 0     | 377   | 152   | 0     | 0     |

### C. Sierra Leone

| Category     | 2005  | 2006  | 2007  | 2008  | 2009  | 2010  | 2011  | 2012  | 2013  | 2014  | 2015  | 2016  | 2017  |
|--------------|-------|-------|-------|-------|-------|-------|-------|-------|-------|-------|-------|-------|-------|
| Total        | 5,566 | 5,566 | 5,526 | 5,446 | 5,409 | 5,332 | 5,263 | 5,182 | 5,034 | 5,219 | 5,024 | 4,846 | 4,821 |
| VPDs         | 694   | 672   | 589   | 548   | 547   | 534   | 502   | 504   | 462   | 448   | 424   | 386   | 345   |
| HIV/AIDS     | 126   | 146   | 164   | 174   | 183   | 183   | 177   | 170   | 167   | 160   | 151   | 138   | 120   |
| Malaria      | 1,260 | 1,281 | 1,298 | 1,318 | 1,244 | 1,143 | 1,068 | 962   | 872   | 795   | 811   | 852   | 846   |
| Tuberculosis | 177   | 175   | 173   | 170   | 169   | 169   | 165   | 163   | 158   | 155   | 151   | 146   | 143   |
| EVD          | 0     | 0     | 0     | 0     | 0     | 0     | 0     | 0     | 0     | 288   | 133   | 0     | 0     |

### D. Democratic Republic of Congo

| Category     | 2005   | 2006   | 2007   | 2008   | 2009   | 2010   | 2011   | 2012   | 2013   | 2014   | 2015   | 2016   | 2017   |
|--------------|--------|--------|--------|--------|--------|--------|--------|--------|--------|--------|--------|--------|--------|
| Total        | 48,720 | 49,163 | 49,654 | 50,049 | 50,473 | 49,704 | 49,240 | 48,743 | 47,624 | 46,594 | 45,460 | 44,729 | 44,300 |
| VPDs         | 6,370  | 6,214  | 6,070  | 6,168  | 6,016  | 6,151  | 6,346  | 6,219  | 5,735  | 5,115  | 4,679  | 4,441  | 4,073  |
| HIV/AIDS     | 2,660  | 2,686  | 2,677  | 2,641  | 2,566  | 2,433  | 2,296  | 2,105  | 1,867  | 1,642  | 1,419  | 1,191  | 1,000  |
| Malaria      | 9,408  | 9,524  | 9,602  | 9,238  | 8,528  | 7,747  | 7,025  | 6,529  | 6,304  | 6,283  | 6,023  | 6,042  | 5,998  |
| Tuberculosis | 2,301  | 2,332  | 2,357  | 2,397  | 2,444  | 2,445  | 2,443  | 2,439  | 2,389  | 2,363  | 2,337  | 2,279  | 2,227  |
| EVD          | 0      | 0      | 21     | 2      | 0      | 0      | 0      | 3      | 0      | 5      | 0      | 0      | 1      |

**Supplementary Table S3: DAH/DALYs in EVD affected countries****A. Guinea**

| Category     | 2005 | 2006 | 2007 | 2008 | 2009 | 2010 | 2011 | 2012 | 2013 | 2014  | 2015   | 2016     | 2017     |
|--------------|------|------|------|------|------|------|------|------|------|-------|--------|----------|----------|
| Total        | 5.8  | 6.4  | 4.8  | 6.2  | 5.8  | 8.0  | 6.4  | 9.8  | 8.0  | 35.3  | 37.2   | 36.2     | 22.6     |
| VPDs         | 3.2  | 3.9  | 0.8  | 5.8  | 7.7  | 9.4  | 3.2  | 4.6  | 4.1  | 6.7   | 14.0   | 3.5      | 1.5      |
| HIV/AIDS     | 42.8 | 44.6 | 29.8 | 29.8 | 31.3 | 31.6 | 44.7 | 25.3 | 64.9 | 60.7  | 70.4   | 155.4    | 91.5     |
| Malaria      | 5.0  | 0.6  | 4.4  | 2.2  | 0.8  | 14.2 | 0.3  | 27.2 | 10.9 | 51.4  | 22.4   | 70.4     | 32.7     |
| Tuberculosis | 0.1  | 5.3  | 6.1  | 8.1  | 4.3  | 10.2 | 1.9  | 1.6  | 8.7  | 14.6  | 10.9   | 15.7     | 17.1     |
| EVD          | —    | —    | —    | —    | —    | —    | —    | —    | 0.0  | 480.3 | 1784.4 | 101943.6 | 39707334 |

**B. Liberia**

| Category     | 2005 | 2006 | 2007 | 2008 | 2009 | 2010  | 2011  | 2012  | 2013  | 2014  | 2015   | 2016     | 2017      |
|--------------|------|------|------|------|------|-------|-------|-------|-------|-------|--------|----------|-----------|
| Total        | 10.5 | 14.5 | 13.6 | 35.8 | 49.4 | 51.9  | 55.6  | 66.3  | 61.3  | 146.4 | 276.8  | 110.1    | 75.3      |
| VPDs         | 6.9  | 18.2 | 12.8 | 20.9 | 50.5 | 17.6  | 25.1  | 38.5  | 25.5  | 7.8   | 44.9   | 16.2     | 23.1      |
| HIV/AIDS     | 34.5 | 28.4 | 52.7 | 69.2 | 95.5 | 126.4 | 153.8 | 151.2 | 192.1 | 80.4  | 99.5   | 173.5    | 179.5     |
| Malaria      | 16.2 | 21.8 | 3.9  | 48.0 | 58.0 | 87.5  | 90.1  | 141.2 | 110.0 | 149.4 | 99.7   | 125.7    | 143.3     |
| Tuberculosis | 46.9 | 33.6 | 2.3  | 43.9 | 71.9 | 62.0  | 45.2  | 98.6  | 57.6  | 6.1   | 18.5   | 22.3     | 17.9      |
| EVD          | —    | —    | —    | —    | —    | —     | —     | —     | —     | 560.6 | 3304.0 | 490373.9 | 172528597 |

### C. Sierra Leone

| Category     | 2005 | 2006 | 2007 | 2008 | 2009 | 2010  | 2011  | 2012  | 2013 | 2014   | 2015   | 2016     | 2017      |
|--------------|------|------|------|------|------|-------|-------|-------|------|--------|--------|----------|-----------|
| Total        | 9.2  | 9.0  | 9.7  | 15.0 | 17.0 | 21.0  | 18.7  | 19.5  | 23.8 | 111.6  | 132.5  | 71.0     | 43.1      |
| VPDs         | 2.0  | 5.3  | 11.0 | 7.2  | 21.9 | 19.7  | 5.6   | 19.2  | 14.3 | 23.2   | 30.6   | 10.8     | 20.2      |
| HIV/AIDS     | 72.0 | 47.8 | 51.4 | 83.5 | 88.9 | 139.3 | 110.0 | 126.7 | 85.4 | 140.3  | 51.8   | 150.1    | 246.6     |
| Malaria      | 6.3  | 6.4  | 4.4  | 8.1  | 5.5  | 8.1   | 16.9  | 4.5   | 13.9 | 22.7   | 8.9    | 17.4     | 19.0      |
| Tuberculosis | 5.4  | 6.6  | 10.9 | 16.6 | 4.4  | 14.6  | 7.2   | 4.7   | 23.8 | 7.3    | 11.2   | 26.0     | 68.7      |
| EVD          | —    | —    | —    | —    | —    | —     | —     | —     | —    | 1253.2 | 3421.3 | 411813.7 | 603652128 |

### D. Democratic Republic of Congo

| Category     | 2005 | 2006 | 2007 | 2008 | 2009 | 2010 | 2011 | 2012 | 2013 | 2014 | 2015      | 2016  | 2017  |
|--------------|------|------|------|------|------|------|------|------|------|------|-----------|-------|-------|
| Total        | 3.6  | 3.8  | 3.8  | 8.8  | 9.4  | 10.0 | 11.5 | 14.2 | 14.3 | 14.5 | 15.9      | 16.0  | 18.5  |
| VPDs         | 2.0  | 4.0  | 3.5  | 8.4  | 6.7  | 10.3 | 12.7 | 4.4  | 13.0 | 21.2 | 21.9      | 16.5  | 16.9  |
| HIV/AIDS     | 15.9 | 15.8 | 16.2 | 29.5 | 34.2 | 40.6 | 42.7 | 77.6 | 69.6 | 49.9 | 61.3      | 105.4 | 151.1 |
| Malaria      | 3.0  | 1.6  | 1.5  | 6.5  | 13.6 | 11.5 | 11.3 | 30.5 | 20.7 | 30.8 | 28.3      | 32.3  | 32.1  |
| Tuberculosis | 1.8  | 4.4  | 6.3  | 7.5  | 5.7  | 6.6  | 6.7  | 15.0 | 9.1  | 9.5  | 18.7      | 16.7  | 14.5  |
| EVD          | —    | —    | 22.3 | 65.9 | 0.0  | —    | —    | 0.0  | 0.0  | 17.1 | 1027481.5 | —     | 123.4 |
